# Supplementary material
Source: PubMed Central journal article supplement (PMC4037130)
Supplement: NIHMS561517-supplement-S1.pdf [file NIHMS561517-supplement-S1.pdf]

Supplementary Information S1 (Table) | **Compound structures and *in vitro* properties**

| Compound                                                     | Structure                                                                           | IC <sub>50</sub>    |             | Refs. |
|--------------------------------------------------------------|-------------------------------------------------------------------------------------|---------------------|-------------|-------|
|                                                              |                                                                                     | FT                  | GGT1        |       |
| 1<br>BZA-2B                                                  | 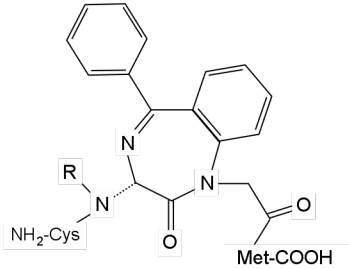   | 0.85 nM             | 35 nM       | 1     |
| 2<br>$\alpha$ -Hydroxy-farnesyl phosphonic acid              |    | 30 nM               | 36 $\mu$ M  | 2     |
| 3<br>BMS-186511                                              |   | 10 nM               | 21 $\mu$ M  | 3     |
| 4<br>HR11:<br>R=H<br><sup>1</sup> HR12:<br>R=CH <sub>3</sub> |  | 1.2 nM              | 907 nM      | 4     |
| 5<br>LB42708                                                 |  | 1.3 nM <sup>3</sup> | 100 $\mu$ M | 5     |

|                                                                                                   |                                                                                     |                                                                              |                                 |           |
|---------------------------------------------------------------------------------------------------|-------------------------------------------------------------------------------------|------------------------------------------------------------------------------|---------------------------------|-----------|
| <p>6<br/>RPR-115135</p>                                                                           | 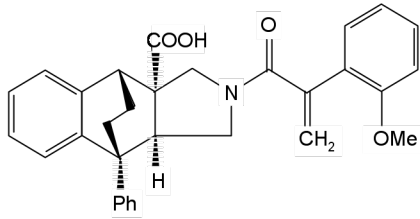   | <p>0.3 <math>\mu</math>M</p>                                                 | <p>n/d</p>                      | <p>6</p>  |
| <p>7<br/>FTI-276:<br/>R=H<br/><sup>1</sup> FTI-277:<br/>R=CH<sub>3</sub></p>                      |    | <p>0.5 nM</p>                                                                | <p>50 nM</p>                    | <p>7</p>  |
| <p>8<br/>FTI-2148:<br/>R=H<br/><sup>1</sup> FTI-2153:<br/>R=CH<sub>3</sub></p>                    |   | <p>1.4 nM</p>                                                                | <p>1.7 <math>\mu</math>M</p>    | <p>8</p>  |
| <p>9<br/>Lonafarnib</p>                                                                           |  | <p>1.9 nM</p>                                                                | <p>&gt;50 <math>\mu</math>M</p> | <p>9</p>  |
| <p>10<br/>SCH56582 <sup>2</sup></p>                                                               | <p>No structure available</p>                                                       | <p>1.4 <math>\mu</math>M for wt FT,<br/>&gt;10 mM for FT<sup>Y361L</sup></p> | <p>n/d</p>                      | <p>10</p> |
| <p>11<br/>L-739,750:<br/>R=H<br/><sup>1</sup> L-744,832:<br/>R=CH(CH<sub>3</sub>)<sub>2</sub></p> |  | <p>1.8 nM</p>                                                                | <p>&gt;3 <math>\mu</math>M</p>  | <p>11</p> |

|                          |                                                                                     |                |                  |               |
|--------------------------|-------------------------------------------------------------------------------------|----------------|------------------|---------------|
| <p>12<br/>L-778,123</p>  | 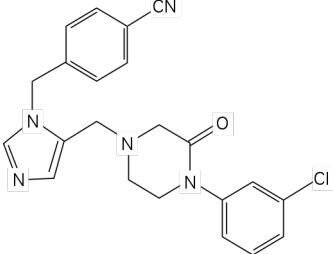   | <p>2 nM</p>    | <p>98 nM</p>     | <p>12</p>     |
| <p>13<br/>BMS-214662</p> |    | <p>1.35 nM</p> | <p>&gt;1 μM</p>  | <p>13</p>     |
| <p>14<br/>Tipifarnib</p> |   | <p>0.9 nM</p>  | <p>&gt;50 μM</p> | <p>14</p>     |
| <p>15<br/>ABT-839</p>    |  | <p>1.0 nM</p>  | <p>&gt;50 μM</p> | <p>15, 16</p> |
| <p>16<br/>FTI-2585</p>   |  | <p>56 nM</p>   | <p>2.7 μM</p>    | <p>17, 18</p> |

|                                                                                  |                                                                                     |                  |               |           |
|----------------------------------------------------------------------------------|-------------------------------------------------------------------------------------|------------------|---------------|-----------|
| <p>17<br/>FTI-2734</p>                                                           | 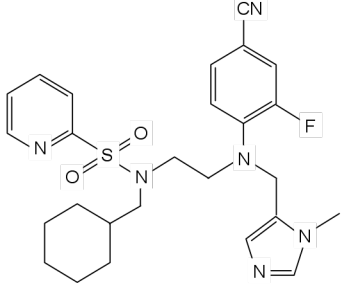   | <p>250 nM</p>    | <p>520 nM</p> | <p>18</p> |
| <p>18<br/>GGTI-297:<br/>R=H<br/><sup>1</sup>GGTI-298:<br/>R=CH<sub>3</sub></p>   |    | <p>203 nM</p>    | <p>56 nM</p>  | <p>19</p> |
| <p>19<br/>GGTI-2154:<br/>R=H<br/><sup>1</sup>GGTI-2166:<br/>R=CH<sub>3</sub></p> |   | <p>5.6 μM</p>    | <p>21 nM</p>  | <p>8</p>  |
| <p>20<br/>GGTI-2418:<br/>R=H<br/><sup>1</sup>GGTI-2417:<br/>R=CH<sub>3</sub></p> |  | <p>53 μM</p>     | <p>9.5 nM</p> | <p>20</p> |
| <p>21<br/>GGTI-DU40</p>                                                          |  | <p>&gt; 2 μM</p> | <p>8.2 nM</p> | <p>21</p> |

|                                 |                                                                                   |                                   |                            |           |
|---------------------------------|-----------------------------------------------------------------------------------|-----------------------------------|----------------------------|-----------|
| <p>22<br/>P61-A6</p>            | 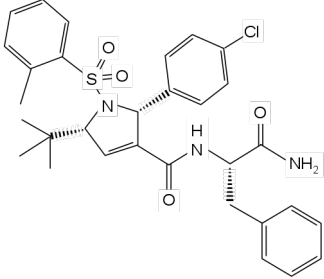 | <p>&gt; 100 <math>\mu</math>M</p> | <p>1 <math>\mu</math>M</p> | <p>22</p> |
| <p>23<br/>GGTI-<br/>DU.Sig3</p> |  | <p>n/d</p>                        | <p>8 <math>\mu</math>M</p> | <p>23</p> |

Compounds 2 and 3 are representative examples of FPP and bisubstrate analogues, respectively. Compounds 5 and 6 are non-peptidomimetic inhibitors, whereas all other PTIs are either CaaX peptidomimetics or inhibitors from high-throughput screening campaigns.

<sup>1</sup> In experiments with intact cells, methylester prodrugs were used to improve cell permeability.

<sup>2</sup> Compound closely related to Lonafarnib (SCH66336)

<sup>3</sup> Average IC<sub>50</sub> resulting from FT activity vs. HRAS, NRAS and KRAS

FT, farnesyltransferase; GGT1, geranylgeranyltransferase 1; FTI, farnesyl-transferase inhibitor; GGTI, geranylgeranyltransferase inhibitor

### References

1. James, G.L. *et al.* Benzodiazepine peptidomimetics: potent inhibitors of Ras farnesylation in animal cells. *Science* **260**, 1937-1942 (1993).
2. Gibbs, J.B. *et al.* Selective inhibition of farnesyl-protein transferase blocks ras processing in vivo. *J. Biol. Chem.* **268**, 7617-7620 (1993).
3. Patel, D.V. *et al.* Phosphinyl acid-based bisubstrate analog inhibitors of Ras farnesyl protein transferase. *J. Med. Chem.* **38**, 435-442 (1995).
4. Reuveni, H., Gitler, A., Poradosu, E., Gilon, C. & Levitzki, A. Synthesis and biological activity of semipeptoid farnesyltransferase inhibitors. *Bioorg. Med. Chem.* **5**, 85-92 (1997).
5. Na, H.J. *et al.* Inhibition of farnesyltransferase prevents collagen-induced arthritis by down-regulation of inflammatory gene expression through suppression of p21(ras)-dependent NF-kappaB activation. *J. Immunol.* **173**, 1276-1283 (2004).

6. Martin, C., Mailliet, P. & Maddaluno, J. Synthesis of oxa-bridged analogues of farnesyltransferase inhibitor RPR 115135. *J. Org. Chem.* **66**, 3797-3805 (2001).
7. Lerner, E.C. *et al.* Ras CAAX peptidomimetic FTI-277 selectively blocks oncogenic Ras signaling by inducing cytoplasmic accumulation of inactive Ras-Raf complexes. *J. Biol. Chem.* **270**, 26802-26806 (1995).
8. Sun, J. *et al.* Antitumor efficacy of a novel class of non-thiol-containing peptidomimetic inhibitors of farnesyltransferase and geranylgeranyltransferase I: combination therapy with the cytotoxic agents cisplatin, Taxol, and gemcitabine. *Cancer Res.* **59**, 4919-4926 (1999).
9. Bishop, W.R. *et al.* Novel tricyclic inhibitors of farnesyl protein transferase. Biochemical characterization and inhibition of Ras modification in transfected Cos cells. *J. Biol. Chem.* **270**, 30611-30618 (1995).
10. Del Villar, K., Mitsuzawa, H., Yang, W., Sattler, I. & Tamanoi, F. Amino acid substitutions that convert the protein substrate specificity of farnesyltransferase to that of geranylgeranyltransferase type I. *J. Biol. Chem.* **272**, 680-687 (1997).
11. Kohl, N.E. *et al.* Protein farnesyltransferase inhibitors block the growth of ras-dependent tumors in nude mice. *Proc. Natl. Acad. Sci. U. S. A.* **91**, 9141-9145 (1994).
12. Buser, C.A. *et al.* High-performance liquid chromatography/mass spectrometry characterization of Ki4B-Ras in PSN-1 cells treated with the prenyltransferase inhibitor L-778,123. *Anal. Biochem.* **290**, 126-137 (2001).
13. Hunt, J.T. *et al.* Discovery of (R)-7-cyano-2,3,4, 5-tetrahydro-1-(1H-imidazol-4-ylmethyl)-3-(phenylmethyl)-4-(2-thienylsulfonyl)-1H-1,4-benzodiazepine (BMS-214662), a farnesyltransferase inhibitor with potent preclinical antitumor activity. *J. Med. Chem.* **43**, 3587-3595 (2000).
14. End, D.W. *et al.* Characterization of the antitumor effects of the selective farnesyl protein transferase inhibitor R115777 in vivo and in vitro. *Cancer Res.* **61**, 131-137 (2001).
15. Curtin, M.L. *et al.* Novel and selective imidazole-containing biphenyl inhibitors of protein farnesyltransferase. *Bioorg. Med. Chem. Lett.* **13**, 1367-1371 (2003).
16. Wang, G.T. *et al.* Design and synthesis of o-trifluoromethylbiphenyl substituted 2-aminonicotinonitriles as inhibitors of farnesyltransferase. *Bioorg. Med. Chem. Lett.* **15**, 153-158 (2005).
17. Fletcher, S. *et al.* Potent, Plasmodium-selective farnesyltransferase inhibitors that arrest the growth of malaria parasites: structure-activity relationships of ethylenediamine-analogue scaffolds and homology model validation. *J. Med. Chem.* **51**, 5176-5197 (2008).
18. Fletcher, S. *et al.* Structure-based design and synthesis of potent, ethylenediamine-based, mammalian farnesyltransferase inhibitors as anticancer agents. *J. Med. Chem.* **53**, 6867-6888 (2010).
19. Sun, J., Qian, Y., Hamilton, A.D. & Sebti, S.M. Both farnesyltransferase and geranylgeranyltransferase I inhibitors are required for inhibition of oncogenic K-Ras prenylation but each alone is sufficient to suppress human tumor growth in nude mouse xenografts. *Oncogene* **16**, 1467-1473 (1998).
20. Peng, H. *et al.* Synthesis and evaluation of potent, highly-selective, 3-aryl-piperazinone inhibitors of protein geranylgeranyltransferase-I. *Org. Biomol. Chem.* **4**, 1768-1784 (2006).

21. Peterson, Y.K., Kelly, P., Weinbaum, C.A. & Casey, P.J. A novel protein geranylgeranyltransferase-I inhibitor with high potency, selectivity, and cellular activity. *J. Biol. Chem.* **281**, 12445-12450 (2006).
22. Watanabe, M. *et al.* Inhibitors of protein geranylgeranyltransferase I and Rab geranylgeranyltransferase identified from a library of allenoate-derived compounds. *J. Biol. Chem.* **283**, 9571-9579 (2008).
23. Peterson, Y.K., Wang, X.S., Casey, P.J. & Tropsha, A. Discovery of geranylgeranyltransferase-I inhibitors with novel scaffolds by the means of quantitative structure-activity relationship modeling, virtual screening, and experimental validation. *J. Med. Chem.* **52**, 4210-4220 (2009).
