# Supplementary material
Source: PubMed Central journal article supplement (PMC4037130)
Supplement: NIHMS561517-supplement-S2.pdf [file NIHMS561517-supplement-S2.pdf]

Supplementary Information S2 (Table) | **Effects of PTIs in intact cells**

| Compound                                     | Model                                                         | Molecular targets and effects                                          | Phenotype                                                           | Refs. |
|----------------------------------------------|---------------------------------------------------------------|------------------------------------------------------------------------|---------------------------------------------------------------------|-------|
| <b>FTIs</b>                                  |                                                               |                                                                        |                                                                     |       |
| $\alpha$ -OH-farnesyl phosphonic acid        | HRAS-transformed NIH 3T3 cells                                | HRAS-F $\downarrow$                                                    | n/d                                                                 | 1     |
| HR-12                                        | HRAS-transformed Rat1 cells                                   | p27 <sup>Kip1</sup> $\uparrow$ , CDK2 $\downarrow$ , p-RB $\downarrow$ | G1 arrest, anchorage-dependent and -independent growth $\downarrow$ | 2     |
| BMS-186511                                   | ST88-14 cells                                                 | HRAS-F $\downarrow$                                                    | Anchorage-independent growth $\downarrow$                           | 3     |
| FTI-277                                      | Ras-transformed NIH 3T3 cells                                 | HRAS-F $\downarrow$ , MAPK activation $\downarrow$                     | n/d                                                                 | 4     |
|                                              |                                                               | HRAS-F $\downarrow$ , MAPK signalling $\downarrow$                     | n/d                                                                 | 5     |
|                                              |                                                               | HRAS-F $\downarrow$ , NRAS-F $\downarrow$ , but no effect on KRAS-F    | n/d                                                                 | 6     |
|                                              | COS-7 cells transfected with AKT2                             | AKT2 activity $\downarrow$                                             | Apoptosis                                                           | 7     |
|                                              | Human ovarian and pancreatic cancer cells overexpressing AKT2 |                                                                        |                                                                     |       |
|                                              | HEK293T cells                                                 | RHEB-F $\downarrow$ , p-S6                                             |                                                                     | 8     |
| Murine <i>Pten</i> -deficient lymphoma cells | RHEB-F $\downarrow$                                           | cell death                                                             | 9                                                                   |       |
| FTI-2153                                     | HRAS-transformed NIH 3T3 cells                                | HRAS-F $\downarrow$ , IC50                                             |                                                                     | 10    |
|                                              | Human cancer cells                                            | n/d                                                                    | anchorage-independent growth $\downarrow$                           |       |
|                                              | A549, CaLu-1                                                  | CENP-E interaction w/microtubules $\downarrow$                         | Prometaphase arrest                                                 | 11    |
|                                              | HFF and NIH 3T3 cells                                         | unknown                                                                | Very little effect on cell proliferation                            | 12    |
|                                              | A549, CaLu-1, OVCAR3                                          |                                                                        | Prometaphase arrest                                                 |       |
|                                              | Human cancer cells                                            | n/d                                                                    | Cell proliferation $\downarrow$ independent of RAS mutation         | 13    |
| L-744,832                                    | MDA-MB-468 cells                                              | MAPK activation $\downarrow$                                           | Cell proliferation $\downarrow$                                     |       |
|                                              | HeLa cells                                                    | No effect on MAPK activation                                           | No effect on cell proliferation                                     |       |
|                                              | Human cancer cells                                            | p21 <sup>Cip1</sup> $\uparrow$ , CDK $\downarrow$ , p-RB $\downarrow$  | G1 arrest                                                           |       |
| Rat-1 cells                                  | RHOB-F $\downarrow$ , RHOB-GG $\uparrow$                      | Cell proliferation $\downarrow$                                        | 15                                                                  |       |
| Lonafarnib                                   | DLD1, A549 cells                                              | CENPE, CENPF interaction with microtubules                             | G2/M arrest                                                         | 16    |
|                                              | HeLa cells                                                    | CENP-F-F $\downarrow$ and degradation $\downarrow$                     | G2/M arrest                                                         | 17    |

should read "CENPE"

should read: "CENPF-F "

|              |                                        |                                                  |                                                                |    |
|--------------|----------------------------------------|--------------------------------------------------|----------------------------------------------------------------|----|
|              | Human HNSCC and NSCLC cells            | p-AKT↑, survivin↑                                | Apoptosis induction requires inhibition of IGFR-AKT signalling | 18 |
|              | Human NSCLC cells low in p-AKT         | PARP cleavage↑                                   | G1 or G2/M arrest, apoptosis                                   | 19 |
|              | Human NSCLC and HNSCC cells            | VEGF↓, HIF-1α↓                                   | Angiogenesis↓                                                  | 20 |
|              | Panc-1 and U2OS cells                  | p-mTOR↓, p-S6K↓                                  | Autophagic cell death                                          | 21 |
|              | Human NSCLC cells overexpressing RHEB  | RHEB-F↓, p-S6K↓, p-S6↓                           | Cell proliferation↓, Apoptosis                                 | 22 |
| BMS-214662   | Human cancer cells                     | HRAS membrane association↓                       | Apoptosis                                                      | 23 |
|              | B cells from CLL patients              | Caspases 9 and 3↑, MCL1↓                         | Apoptosis                                                      | 24 |
| Tipifarnib   | NIH 3T3 cells                          | n/d                                              | No effect on cell proliferation                                | 25 |
|              | <i>Hras</i> -transformed NIH 3T3 cells | HRAS-F↓, NRAS-F↓, laminA-F↓                      | Cell proliferation↓, IC50=1.7nM                                |    |
|              | Human NSCLC cells overexpressing RHEB  | RHEB-F↓, p-S6K↓, p-S6↓                           | Cell proliferation↓, Apoptosis                                 | 22 |
| LB42722      | <i>Ras</i> -transformed C3H 10T½ cells | VEGF↓, FAS↑                                      | FAS-induced apoptosis                                          | 26 |
| LB42708      | HUVECS                                 | p-MAPK↓, p-AKT↓                                  | Angiogenesis↓                                                  | 27 |
| <b>GGTIs</b> |                                        |                                                  |                                                                |    |
| GGTI-298     | Human cancer cells                     | p21 <sup>Cip1</sup> ↑, CDK2/4↓, p-RB↓            | G1 arrest                                                      | 28 |
|              | Human cancer cells                     | RAP1A-GG↓, IC50=3μM<br>HRAS-F↓, IC50>20μM        | G1 arrest                                                      | 29 |
|              | Human cancer cells                     | RHOA-GG↓, CDK2 and 4 activities↓, p-RB↓          | n/d                                                            | 30 |
|              | Human NSCLC cells                      | DR4 and DR5↑, c-FLIP↓                            | TRAIL-induced apoptosis                                        | 31 |
| GGTI-2166    | <i>Hras</i> -transformed NIH 3T3 cells | RAP1A-GG↓, IC50=0.3μM                            | n/d                                                            | 10 |
|              | Human ovarian cancer cells             | p-AKT↓, survivin↓                                | Apoptosis                                                      | 32 |
| GGTI-2417    | MiaPaCa2 cells                         | RALB                                             | Apoptosis, anchorage-dependent growth↓                         | 33 |
|              |                                        | RALA                                             | Anchorage-independent growth↓                                  |    |
|              | Human breast cancer cells              | RAP1-GG↓, IC50=0.4μM, p27↑<br>HRAS-F↓, IC50>50μM | Apoptosis                                                      | 34 |
| GGTI-DU40    | MDA-MB-231 cells                       | RAP1A-GG↓, RHO-GG↓                               | Thrombin-induced cell rounding↓                                | 35 |
| P61-A6       | K562 cells                             | RHOA-GG↓, p21 <sup>Cip1</sup> ↑                  | G1 arrest, cell proliferation↓, IC50=2.2 μM                    | 36 |

| Combinations with FTIs               |                                         |                                                       |                                                     |    |
|--------------------------------------|-----------------------------------------|-------------------------------------------------------|-----------------------------------------------------|----|
| FTI-277 + radiation                  | <i>Hras</i> -transformed REF cells      | HRAS-F↓                                               | Sensitisation                                       | 37 |
|                                      | Cells expressing activated HRAS or KRAS | HRAS-F↓, KRAS↓                                        | Sensitisation                                       | 38 |
| FTI-277 + GGTI-298                   | <i>Ras</i> -transformed NIH 3T3 cells   | KRAS-F↓ and KRAS-GG↓                                  | n/d                                                 | 6  |
| FTI-277 or Lonafarnib + taxane       | PTX10 cells                             | Microtubule-bound paclitaxel↑                         | M-phase arrest. Synergy                             | 39 |
| L-744,832 + taxane                   | MCF-7 and MDA-MB-468 cells              | n/d                                                   | Cell proliferation↓, apoptosis. Synergy             | 40 |
| L-744,832 + cisplatin                | HeLa cells                              | HRAS↓                                                 | Cell proliferation↓, apoptosis. Synergy             | 41 |
| L-744,832 + CDK inhibitors           | MCF-7 cells                             | p53↑                                                  | G1 arrest and apoptosis. Synergy                    | 42 |
| Lonafarnib + taxane                  | Human cancer cells                      | n/d                                                   | Cell proliferation↓. Synergy                        | 43 |
|                                      | Human cancer cells                      | HDAC6 activity↓                                       | M-phase arrest. Synergy                             | 44 |
|                                      | A549 cells                              | FT dissociates from microtubules → HDAC6 activity↓    | Cell survival↓. Synergy                             | 45 |
| Lonafarnib + taxane, tamoxifen       | Human breast cancer cells               | RHEB-F↓, mTOR↓. Synergy                               | n/d                                                 | 46 |
| Lonafarnib + cisplatin               | A549 and T98G cells                     | n/d                                                   | Anchorage-dependent growth↓. Synergy                | 47 |
| Lonafarnib + Imatinib                | Imatinib-resistant CML cells            | Caspase 3↑                                            | Apoptosis. Synergy                                  | 48 |
| Lonafarnib + TNF or doxorubicin      | Jurkat cells                            | NFκB activation↓. Expression of NFκB-dependent genes↓ | Sensitisation to TNF-induced apoptosis              | 49 |
| Lonafarnib + MEK1/2 inhibitors       | <i>Hras</i> -transformed Rat2 cells     | p-MAPK↓                                               | Apoptosis. Synergy                                  | 50 |
| Lonafarnib or Tipifarnib + cisplatin | A549 cells                              | p-S6↓, PARP cleavage↑                                 | Cisplatin enhances inhibition of cell survival      | 22 |
| RPR-115135 + 5-fluorouracil          | Human cancer cells expressing wt p53    | n/d                                                   | Cell proliferation↓. Synergy                        | 51 |
| SCH56582 + CDK inhibitors            | Human cancer cells                      | p-RB↓                                                 | Apoptosis                                           | 52 |
| Tipifarnib + taxane                  | Multiple myeloma cells                  | Caspase 3↑                                            | G2/M arrest and apoptosis. Synergy                  | 53 |
| Tipifarnib + tamoxifen               | MCF-7 cells                             | Cyclin D1↓, p27 <sup>Kip1</sup> ↑                     | G1 arrest. Synergy                                  | 54 |
| Tipifarnib + TCN                     | Human cancer cells                      | p-S6K↓, caspase 3↑. Synergy                           | Anchorage-dependent and independent growth. Synergy | 55 |

Downward arrows indicate inhibition of activity or reduced expression, upward arrows indicate activation or increased expression.

Cells and cell lines: A549, human lung adenocarcinoma; CaLu-1, human non-small cell lung cancer; C3H 10T $\frac{1}{2}$ , NIH 3T3, mouse embryonic fibroblasts; COS-7, African green monkey SV40-transformed kidney cells; DLD1, human colorectal adenocarcinoma; HEK293T, human embryonic kidney cells transformed by the Large T antigen from SV40 resulting in inactivation of RB; HeLa, human cervical cancer; HUVECs, human umbilical vein endothelial cells; K562, human chronic myeloid leukaemia; HFF, normal human foreskin fibroblasts; MCF-7, MDA-MB-231, MDA-MB-468, human breast cancer; MiaPaCa2, Panc-1, human pancreatic cancer; OVCAR3, human ovarian carcinoma; PTX10, human ovarian cancer cell line resistant to paclitaxel; Rat-1, REF, rat embryonic fibroblasts; ST88-14, malignant Schwannoma; T98G, human glioblastoma; U2OS, human osteosarcoma

CLL, chronic lymphocytic leukaemia; HNSCC, head and neck squamous cell carcinoma; IGFR; insulin-like growth factor receptor; MCL1, myeloid cell leukaemia sequence 1 (BCL2-related); n/d not determined; NSCLC, non-small cell lung cancer; p-, phosphorylated form of a protein; RB, retinoblastoma protein; S6, ribosomal protein S6; S6K, ribosomal protein S6 kinase; TRAIL: TNF-related apoptosis-inducing ligand; VEGF, vascular endothelial growth factor

- Gibbs, J.B. *et al.* Selective inhibition of farnesyl-protein transferase blocks ras processing in vivo. *J. Biol. Chem.* **268**, 7617-7620 (1993).
- Reuveni, H., Klein, S. & Levitzki, A. The inhibition of Ras farnesylation leads to an increase in p27Kip1 and G1 cell cycle arrest. *Eur. J. Biochem.* **270**, 2759-2772 (2003).
- Yan, N. *et al.* Farnesyltransferase inhibitors block the neurofibromatosis type I (NF1) malignant phenotype. *Cancer Res.* **55**, 3569-3575 (1995).
- Sun, J., Qian, Y., Hamilton, A.D. & Sebti, S.M. Ras CAAX peptidomimetic FTI 276 selectively blocks tumor growth in nude mice of a human lung carcinoma with K-Ras mutation and p53 deletion. *Cancer Res.* **55**, 4243-4247 (1995).
- Lerner, E.C. *et al.* Ras CAAX peptidomimetic FTI-277 selectively blocks oncogenic Ras signaling by inducing cytoplasmic accumulation of inactive Ras-Raf complexes. *J. Biol. Chem.* **270**, 26802-26806 (1995).
- Sun, J., Qian, Y., Hamilton, A.D. & Sebti, S.M. Both farnesyltransferase and geranylgeranyltransferase I inhibitors are required for inhibition of oncogenic K-Ras prenylation but each alone is sufficient to suppress human tumor growth in nude mouse xenografts. *Oncogene* **16**, 1467-1473 (1998).
- Jiang, K. *et al.* The phosphoinositide 3-OH kinase/AKT2 pathway as a critical target for farnesyltransferase inhibitor-induced apoptosis. *Mol. Cell. Biol.* **20**, 139-148 (2000).
- Castro, A.F., Rebhun, J.F., Clark, G.J. & Quilliam, L.A. Rheb binds tuberous sclerosis complex 2 (TSC2) and promotes S6 kinase activation in a rapamycin- and farnesylation-dependent manner. *J. Biol. Chem.* **278**, 32493-32496 (2003).
- Mavrakis, K.J. *et al.* Tumorigenic activity and therapeutic inhibition of

- Rheb GTPase. *Genes Dev.* **22**, 2178-2188 (2008).
10. Sun, J. *et al.* Antitumor efficacy of a novel class of non-thiol-containing peptidomimetic inhibitors of farnesyltransferase and geranylgeranyltransferase I: combination therapy with the cytotoxic agents cisplatin, Taxol, and gemcitabine. *Cancer Res.* **59**, 4919-4926 (1999).
  11. Crespo, N.C., Ohkanda, J., Yen, T.J., Hamilton, A.D. & Sebti, S.M. The farnesyltransferase inhibitor, FTI-2153, blocks bipolar spindle formation and chromosome alignment and causes prometaphase accumulation during mitosis of human lung cancer cells. *J. Biol. Chem.* **276**, 16161-16167 (2001).
  12. Crespo, N.C. *et al.* The farnesyltransferase inhibitor, FTI-2153, inhibits bipolar spindle formation during mitosis independently of transformation and Ras and p53 mutation status. *Cell Death Differ.* **9**, 702-709 (2002).
  13. Sepp-Lorenzino, L. *et al.* A peptidomimetic inhibitor of farnesyl:protein transferase blocks the anchorage-dependent and -independent growth of human tumor cell lines. *Cancer Res.* **55**, 5302-5309 (1995).
  14. Sepp-Lorenzino, L. & Rosen, N. A farnesyl-protein transferase inhibitor induces p21 expression and G1 block in p53 wild type tumor cells. *J. Biol. Chem.* **273**, 20243-20251 (1998).
  15. Du, W., Lebowitz, P.F. & Prendergast, G.C. Cell growth inhibition by farnesyltransferase inhibitors is mediated by gain of geranylgeranylated RhoB. *Mol. Cell Biol.* **19**, 1831-1840 (1999).
  16. Ashar, H.R. *et al.* Farnesyl transferase inhibitors block the farnesylation of CENP-E and CENP-F and alter the association of CENP-E with the microtubules. *J. Biol. Chem.* **275**, 30451-30457 (2000).
  17. Hussein, D. & Taylor, S.S. Farnesylation of Cenp-F is required for G2/M progression and degradation after mitosis. *J. Cell Sci.* **115**, 3403-3414 (2002).
  18. Suzuki, N., Urano, J. & Tamanoi, F. Farnesyltransferase inhibitors induce cytochrome c release and caspase 3 activation preferentially in transformed cells. *Proc. Natl. Acad. Sci. U. S. A.* **95**, 15356-15361 (1998).
  19. Sun, S.Y., Zhou, Z., Wang, R., Fu, H. & Khuri, F.R. The farnesyltransferase inhibitor Lonafarnib induces growth arrest or apoptosis of human lung cancer cells without downregulation of Akt. *Cancer Biol. Ther.* **3**, 1092-1098; discussion 1099-1101 (2004).
  20. Han, J.Y. *et al.* Hypoxia-inducible factor 1 $\alpha$  and antiangiogenic activity of farnesyltransferase inhibitor SCH66336 in human aerodigestive tract cancer. *J. Natl. Cancer Inst.* **97**, 1272-1286 (2005).
  21. Pan, J. *et al.* Autophagy induced by farnesyltransferase inhibitors in cancer cells. *Cancer Biol. Ther.* **7**, 1679-1684 (2008).
  22. Zheng, H. *et al.* Ras homologue enriched in brain is a critical target of farnesyltransferase inhibitors in non-small cell lung cancer cells. *Cancer Lett.* **297**, 117-125 (2010).
  23. Rose, W.C. *et al.* Preclinical antitumor activity of BMS-214662, a highly apoptotic and novel farnesyltransferase inhibitor. *Cancer Res.* **61**, 7507-7517 (2001).
  24. Marzo, I. *et al.* Farnesyltransferase inhibitor BMS-214662 induces apoptosis in B-cell chronic lymphocytic leukemia cells. *Leukemia* **18**, 1599-1604 (2004).
  25. End, D.W. *et al.* Characterization of the antitumor effects of the selective farnesyl protein transferase inhibitor R115777 in vivo and in vitro. *Cancer Res.* **61**, 131-137 (2001).
  26. Zhang, B., Prendergast, G.C. & Fenton, R.G. Farnesyltransferase inhibitors reverse Ras-mediated inhibition of Fas gene expression. *Cancer Res.* **62**, 450-458 (2002).
  27. Kim, C.K. *et al.* The farnesyltransferase inhibitor LB42708 suppresses vascular endothelial

- growth factor-induced angiogenesis by inhibiting ras-dependent mitogen-activated protein kinase and phosphatidylinositol 3-kinase/Akt signal pathways. *Mol. Pharmacol.* **78**, 142-150 (2010).
28. Vogt, A., Sun, J., Qian, Y., Hamilton, A.D. & Sebti, S.M. The geranylgeranyltransferase-I inhibitor GGTI-298 arrests human tumor cells in G0/G1 and induces p21(WAF1/CIP1/SDI1) in a p53-independent manner. *J. Biol. Chem.* **272**, 27224-27229 (1997).
  29. Vogt, A., Qian, Y., McGuire, T.F., Hamilton, A.D. & Sebti, S.M. Protein geranylgeranylation, not farnesylation, is required for the G1 to S phase transition in mouse fibroblasts. *Oncogene* **13**, 1991-1999 (1996).
  30. Sun, J. *et al.* The geranylgeranyltransferase I inhibitor GGTI-298 induces hypophosphorylation of retinoblastoma and partner switching of cyclin-dependent kinase inhibitors. A potential mechanism for GGTI-298 antitumor activity. *J. Biol. Chem.* **274**, 6930-6934 (1999).
  31. Chen, S. *et al.* Dissecting the roles of DR4, DR5 and c-FLIP in the regulation of geranylgeranyltransferase I inhibition-mediated augmentation of TRAIL-induced apoptosis. *Mol. Cancer* **9**, 23 (2010).
  32. Dan, H.C. *et al.* Phosphatidylinositol-3-OH kinase/AKT and survivin pathways as critical targets for geranylgeranyltransferase I inhibitor-induced apoptosis. *Oncogene* **23**, 706-715 (2004).
  33. Falsetti, S.C. *et al.* Geranylgeranyltransferase I inhibitors target RalB to inhibit anchorage-dependent growth and induce apoptosis and RalA to inhibit anchorage-independent growth. *Mol. Cell. Biol.* **27**, 8003-8014 (2007).
  34. Kazi, A. *et al.* Blockade of protein geranylgeranylation inhibits Cdk2-dependent p27Kip1 phosphorylation on Thr187 and accumulates p27Kip1 in the nucleus: implications for breast cancer therapy. *Mol. Cell. Biol.* **29**, 2254-2263 (2009).
  35. Peterson, Y.K., Kelly, P., Weinbaum, C.A. & Casey, P.J. A novel protein geranylgeranyltransferase-I inhibitor with high potency, selectivity, and cellular activity. *J. Biol. Chem.* **281**, 12445-12450 (2006).
  36. Watanabe, M. *et al.* Inhibitors of protein geranylgeranyltransferase I and Rab geranylgeranyltransferase identified from a library of allenolate-derived compounds. *J. Biol. Chem.* **283**, 9571-9579 (2008).
  37. Bernhard, E.J. *et al.* The farnesyltransferase inhibitor FTI-277 radiosensitizes H-ras-transformed rat embryo fibroblasts. *Cancer Res.* **56**, 1727-1730 (1996).
  38. Bernhard, E.J. *et al.* Inhibiting Ras prenylation increases the radiosensitivity of human tumor cell lines with activating mutations of ras oncogenes. *Cancer Res.* **58**, 1754-1761 (1998).
  39. Marcus, A.I. *et al.* Farnesyltransferase inhibitors reverse taxane resistance. *Cancer Res.* **66**, 8838-8846 (2006).
  40. Moasser, M.M. *et al.* Farnesyl transferase inhibitors cause enhanced mitotic sensitivity to taxol and epothilones. *Proc. Natl. Acad. Sci. U. S. A.* **95**, 1369-1374 (1998).
  41. Wesierska-Gadek, J., Kramer, M.P. & Schmid, G. A combined treatment of HeLa cells with the farnesyl protein transferase inhibitor L-744,832 and cisplatin significantly increases the therapeutic effect as compared to cisplatin monotherapy. *J. Cell. Biochem.* **104**, 189-201 (2008).
  42. Wesierska-Gadek, J., Maurer, M. & Schmid, G. Inhibition of farnesyl protein transferase sensitizes human MCF-7 breast cancer cells to roscovitine-mediated cell cycle arrest. *J. Cell. Biochem.* **102**, 736-747 (2007).
  43. Shi, B. *et al.* The farnesyl protein transferase inhibitor SCH66336 synergizes with taxanes in vitro and enhances their antitumor activity in



- vivo. *Cancer Chemother. Pharmacol.* **46**, 387-393 (2000).
44. Marcus, A.I. *et al.* The synergistic combination of the farnesyl transferase inhibitor lonafarnib and paclitaxel enhances tubulin acetylation and requires a functional tubulin deacetylase. *Cancer Res.* **65**, 3883-3893 (2005).
45. Zhou, J. *et al.* The protein farnesyltransferase regulates HDAC6 activity in a microtubule-dependent manner. *J. Biol. Chem.* **284**, 9648-9655 (2009).
46. Basso, A.D. *et al.* The farnesyl transferase inhibitor (FTI) SCH66336 (lonafarnib) inhibits Rheb farnesylation and mTOR signaling. Role in FTI enhancement of taxane and tamoxifen anti-tumor activity. *J. Biol. Chem.* **280**, 31101-31108 (2005).
47. Adjei, A.A., Davis, J.N., Bruzek, L.M., Erlichman, C. & Kaufmann, S.H. Synergy of the protein farnesyltransferase inhibitor SCH66336 and cisplatin in human cancer cell lines. *Clin. Cancer Res.* **7**, 1438-1445 (2001).
48. Hoover, R.R., Mahon, F.X., Melo, J.V. & Daley, G.Q. Overcoming STI571 resistance with the farnesyl transferase inhibitor SCH66336. *Blood* **100**, 1068-1071 (2002).
49. Takada, Y., Khuri, F.R. & Aggarwal, B.B. Protein farnesyltransferase inhibitor (SCH 66336) abolishes NF- $\kappa$ B activation induced by various carcinogens and inflammatory stimuli leading to suppression of NF- $\kappa$ B-regulated gene expression and up-regulation of apoptosis. *J. Biol. Chem.* **279**, 26287-26299 (2004).
50. Brassard, D.L. *et al.* Inhibitors of farnesyl protein transferase and MEK1,2 induce apoptosis in fibroblasts transformed with farnesylated but not geranylgeranylated H-Ras. *Exp. Cell Res.* **273**, 138-146 (2002).
51. Russo, P., Malacarne, D., Falugi, C., Trombino, S. & O'Connor, P.M. RPR-115135, a farnesyltransferase inhibitor, increases 5-FU- cytotoxicity in ten human colon cancer cell lines: role of p53. *Int. J. Cancer* **100**, 266-275 (2002).
52. Edamatsu, H., Gau, C.L., Nemoto, T., Guo, L. & Tamanoi, F. Cdk inhibitors, roscovitine and olomoucine, synergize with farnesyltransferase inhibitor (FTI) to induce efficient apoptosis of human cancer cell lines. *Oncogene* **19**, 3059-3068 (2000).
53. Zhu, K. *et al.* Farnesyltransferase inhibitor R115777 (Zarnestra, Tipifarnib) synergizes with paclitaxel to induce apoptosis and mitotic arrest and to inhibit tumor growth of multiple myeloma cells. *Blood* **105**, 4759-4766 (2005).
54. Martin, L.A. *et al.* The farnesyltransferase inhibitor R115777 (tipifarnib) in combination with tamoxifen acts synergistically to inhibit MCF-7 breast cancer cell proliferation and cell cycle progression in vitro and in vivo. *Mol. Cancer Ther.* **6**, 2458-2467 (2007).
55. Balasis, M.E. *et al.* Combination of farnesyltransferase and Akt inhibitors is synergistic in breast cancer cells and causes significant tumor regression in ErbB2 transgenic mice. *Clin. Cancer Res.* **17**, 2852-2862 (2011).
