# Supplementary material
Source: PubMed Central journal article supplement (PMC4037130)
Supplement: NIHMS561517-supplement-S3.pdf [file NIHMS561517-supplement-S3.pdf]

Supplementary Information S3 (Table) | **Effects of PTIs *in vivo***

| Compound     | Animal model                                                                                                                       | Molecular targets and effects | Phenotype                                      | Refs. |
|--------------|------------------------------------------------------------------------------------------------------------------------------------|-------------------------------|------------------------------------------------|-------|
| <b>FTIs</b>  |                                                                                                                                    |                               |                                                |       |
| L-739,749    | Xenografts with <i>Nras</i> -transformed Rat-1 cells                                                                               | n/d                           | Tumour growth↓                                 | 1     |
| FTI-276      | Xenografts with CaLu-1 cells <sup>2</sup>                                                                                          | HRAS-F↓                       | Tumour growth↓                                 | 2     |
|              | Xenografts with <i>Kras</i> -transformed NIH 3T3 cells                                                                             | n/d                           | Tumour growth↓                                 | 3     |
| L-744,832    | <i>MMTV-Hras</i> transgenic mice                                                                                                   | n/d                           | Tumour regression                              | 4     |
|              | <i>MMTV-Nras</i> transgenic mice                                                                                                   | HRAS-F↓                       | Tumour growth↓                                 | 5     |
|              | <i>MMTV-Hras</i> transgenic mice                                                                                                   | n/d                           | Apoptosis↑, tumour regression                  | 6     |
|              | <i>MMTV-Hras; Trp53<sup>-/-</sup></i> transgenic mice                                                                              | n/d                           | Apoptosis↑, G1 arrest, tumour regression       |       |
|              | <i>MMTV-Hras; Myc</i> transgenic mice                                                                                              | n/d                           | Number of cells in S-phase↓, tumour regression |       |
|              | <i>MMTV-ErbB2</i> transgenic mice                                                                                                  | n/d                           | No response                                    |       |
|              | <i>MMTV-Kras</i> transgenic mice                                                                                                   | No effect on KRAS             | Tumour growth↓                                 | 7     |
|              | Xenografts with HT-29 <sup>1</sup> or RT-4 cells <sup>1</sup>                                                                      | HRAS-F not affected           | No effect on oxygenation                       | 8     |
|              | Xenografts with T24 <sup>3</sup> or 141-1 cells <sup>3</sup>                                                                       | HRAS-F↓                       | Oxygenation of tumours↑                        |       |
| FTI-2148     | Xenografts with A549 cells                                                                                                         |                               | Tumour growth↓                                 | 9     |
|              | <i>MMTV-Hras</i> transgenic mice                                                                                                   | HRAS-F↓, HDJ2-F↓              | Tumour regression                              | 10    |
| BMS-214662   | Xenografts with HT-29 <sup>1</sup> , HCT-116 <sup>2</sup> , MiaPaCa-2 <sup>2</sup> , CaLu-1 <sup>2</sup> , EJ-1 cells <sup>3</sup> | HRAS-F↓                       | Tumour regression                              | 11    |
|              | Murine tumours (Lewis lung carcinoma and M5076 sarcoma)                                                                            | n/d                           | No or very little effect                       |       |
| Tipifarnib   | Xenografts with human cancer cells                                                                                                 | n/d                           | Tumour growth↓ independent of RAS mutation     | 12    |
|              | Xenografts with U87 cells                                                                                                          | HRAS-F↓, HIF-1α↓              | Vessel density↓                                | 13    |
| L-778,123    | Dogs, i.v. infusion with canine PBMCs                                                                                              | HDJ2-F↓, RAP1A-GG↓,           | n/d                                            | 14    |
|              | PBMCs from human patients                                                                                                          | No effect on KRAS             |                                                |       |
| <b>GGTIs</b> |                                                                                                                                    |                               |                                                |       |

|                                                  |                                                                                                            |                    |                                                            |    |
|--------------------------------------------------|------------------------------------------------------------------------------------------------------------|--------------------|------------------------------------------------------------|----|
| GGTI-297                                         | Xenografts with <i>Hras</i> -transformed NIH 3T3 cells and A549 <sup>2</sup> and CaLu-1 <sup>2</sup> cells | n/d                | Tumour growth↓                                             | 3  |
| GGTI-2154                                        | Xenografts                                                                                                 | n/d                | Tumour growth↓                                             | 9  |
|                                                  | <i>MMTV-Hras</i> transgenic mice                                                                           | RHOA-GG↓, RAP1-GG↓ | Tumour regression, apoptosis                               | 10 |
| GGTI-2418                                        | Xenografts with MDA-MB-231 cells                                                                           | n/d                | Tumour growth↓                                             | 15 |
|                                                  | <i>MMTV-ErbB2</i> transgenic mice                                                                          | p27Kip1↑, p-AKT↓   | Tumour regression                                          |    |
| P61-A6                                           | Xenografts with PANC-1 cells                                                                               | RAP1-GG↓, RHOA-GG↓ | Tumour growth↓                                             | 16 |
| <b>Combination strategies</b>                    |                                                                                                            |                    |                                                            |    |
| FTI-276 + GGTI-297                               | Xenografts with <i>Kras</i> -transformed NIH 3T3 cells                                                     | n/d                | Tumour growth↓ more pronounced than with either drug alone | 3  |
| Lonafarnib + cyclophosphamide, 5-FU, vincristine | Xenografts with human cancer cells                                                                         |                    | Tumour growth↓. Synergy                                    | 17 |
|                                                  | <i>Hras</i> transgenic mice                                                                                |                    | Tumour regression                                          |    |
| Lonafarnib + taxanes                             | Xenografts with NCI-H460 cells                                                                             |                    | Tumour growth↓. Synergy                                    | 18 |
| FTI-2148 + cisplatin, gemcitabine & taxane       | Xenografts with A549 cells <sup>2</sup>                                                                    |                    | Tumour growth↓. Synergy                                    | 9  |
| Tipifarnib + taxane                              | SCID-hu bone mice reconstituted with RPMI8226/S cells                                                      | n/d                | Tumour growth↓. Synergy                                    | 19 |
| Tipifarnib + budesonide                          | Vinyl carbamate-induced lung tumours                                                                       | n/d                | Lung tumour prevention. Synergy                            | 20 |
| Tipifarnib + tamoxifen                           | Xenografts with MCF-7 cells                                                                                | n/d                | Tumour growth↓. Synergy                                    | 21 |
| Tipifarnib + TCN                                 | <i>MMTV-ErbB2</i> transgenic mice                                                                          | n/d                | Tumour regression, Synergy                                 | 22 |
| GGTI-2154 + cisplatin, gemcitabine & taxane      | Xenografts with A549 cells <sup>2</sup>                                                                    | n/d                | Tumour growth↓. Synergy                                    | 9  |

In studies that did not determine the effect of a drug on its molecular target(s) in the animal model, this was done in intact cells. See [TABLE 2](#) and [Supplementary Information S3](#) (Table).

Downward arrows indicate inhibition of the indicated process, upward arrows indicate increase.

<sup>1</sup> Cell line expressing wild-type HRAS and KRAS,

<sup>2</sup> Cell line expressing oncogenic KRAS,

<sup>3</sup> Cell line expressing oncogenic HRAS (COSMIC database).

Cell lines: 141-1, prostate tumour; A549, human lung adenocarcinoma; CaLu-1, NCI-H460, human non-small cell lung cancer; EJ-1, human bladder cancer; HT-29, HT-116, human colon cancer; MCF-7, MDA-MB-231, human breast cancer; MiaPaCa2, PANC-1, human pancreatic cancer; RPMI8226/S, human multiple myeloma; RT-4, human bladder carcinoma; U87, human glioblastoma

5-FU, 5-fluorouracil; MMTV, mouse mammary tumour virus; n/d, not determined; p-, phosphorylated form of a protein; PBMCs, peripheral blood mononuclear cells

1. Kohl, N.E. *et al.* Protein farnesyltransferase inhibitors block the growth of ras-dependent tumors in nude mice. *Proc. Natl. Acad. Sci. U. S. A.* **91**, 9141-9145 (1994).
2. Sun, J., Qian, Y., Hamilton, A.D. & Sebti, S.M. Ras CAAX peptidomimetic FTI 276 selectively blocks tumor growth in nude mice of a human lung carcinoma with K-Ras mutation and p53 deletion. *Cancer Res.* **55**, 4243-4247 (1995).
3. Sun, J., Qian, Y., Hamilton, A.D. & Sebti, S.M. Both farnesyltransferase and geranylgeranyltransferase I inhibitors are required for inhibition of oncogenic K-Ras prenylation but each alone is sufficient to suppress human tumor growth in nude mouse xenografts. *Oncogene* **16**, 1467-1473 (1998).
4. Kohl, N.E. *et al.* Inhibition of farnesyltransferase induces regression of mammary and salivary carcinomas in ras transgenic mice. *Nat. Med.* **1**, 792-797 (1995).
5. Manges, R. *et al.* Antitumor effect of a farnesyl protein transferase inhibitor in mammary and lymphoid tumors overexpressing N-ras in transgenic mice. *Cancer Res.* **58**, 1253-1259 (1998).
6. Barrington, R.E. *et al.* A farnesyltransferase inhibitor induces tumor regression in transgenic mice harboring multiple oncogenic mutations by mediating alterations in both cell cycle control and apoptosis. *Mol. Cell. Biol.* **18**, 85-92 (1998).
7. Omer, C.A. *et al.* Mouse mammary tumor virus-Ki-rasB transgenic mice develop mammary carcinomas that can be growth-inhibited by a farnesyl:protein transferase inhibitor. *Cancer Res.* **60**, 2680-2688 (2000).
8. Han, J.Y. *et al.* Hypoxia-inducible factor 1 $\alpha$  and antiangiogenic activity of farnesyltransferase inhibitor SCH66336 in human aerodigestive tract cancer. *J. Natl. Cancer Inst.* **97**, 1272-1286 (2005).
9. Sun, J. *et al.* Antitumor efficacy of a novel class of non-thiol-containing peptidomimetic inhibitors of farnesyltransferase and geranylgeranyltransferase I: combination therapy with the cytotoxic agents cisplatin, Taxol, and gemcitabine. *Cancer Res.* **59**, 4919-4926 (1999).

10. Sun, J. *et al.* Geranylgeranyltransferase I inhibitor GGTI-2154 induces breast carcinoma apoptosis and tumor regression in H-Ras transgenic mice. *Cancer Res.* **63**, 8922-8929 (2003).
11. Rose, W.C. *et al.* Preclinical antitumor activity of BMS-214662, a highly apoptotic and novel farnesyltransferase inhibitor. *Cancer Res.* **61**, 7507-7517 (2001).
12. End, D.W. *et al.* Characterization of the antitumor effects of the selective farnesyl protein transferase inhibitor R115777 in vivo and in vitro. *Cancer Res.* **61**, 131-137 (2001).
13. Cohen-Jonathan, E. *et al.* The farnesyltransferase inhibitor L744,832 reduces hypoxia in tumors expressing activated H-ras. *Cancer Res.* **61**, 2289-2293 (2001).
14. Lobell, R.B. *et al.* Preclinical and clinical pharmacodynamic assessment of L-778,123, a dual inhibitor of farnesyl:protein transferase and geranylgeranyl:protein transferase type-I. *Mol. Cancer Ther.* **1**, 747-758 (2002).
15. Kazi, A. *et al.* Blockade of protein geranylgeranylation inhibits Cdk2-dependent p27Kip1 phosphorylation on Thr187 and accumulates p27Kip1 in the nucleus: implications for breast cancer therapy. *Mol. Cell. Biol.* **29**, 2254-2263 (2009).
16. Lu, J. *et al.* In vivo antitumor effect of a novel inhibitor of protein geranylgeranyltransferase-I. *Mol. Cancer Ther.* **8**, 1218-1226 (2009).
17. Liu, M. *et al.* Antitumor activity of SCH 66336, an orally bioavailable tricyclic inhibitor of farnesyl protein transferase, in human tumor xenograft models and wap-ras transgenic mice. *Cancer Res.* **58**, 4947-4956 (1998).
18. Shi, B. *et al.* The farnesyl protein transferase inhibitor SCH66336 synergizes with taxanes in vitro and enhances their antitumor activity in vivo. *Cancer Chemother. Pharmacol.* **46**, 387-393 (2000).
19. Zhu, K. *et al.* Farnesyltransferase inhibitor R115777 (Zarnestra, Tipifarnib) synergizes with paclitaxel to induce apoptosis and mitotic arrest and to inhibit tumor growth of multiple myeloma cells. *Blood* **105**, 4759-4766 (2005).
20. Alyaqoub, F.S. *et al.* Prevention of mouse lung tumors and modulation of DNA methylation by combined treatment with budesonide and R115777 (Zarnestra MT). *Carcinogenesis* **28**, 124-129 (2007).
21. Martin, L.A. *et al.* The farnesyltransferase inhibitor R115777 (tipifarnib) in combination with tamoxifen acts synergistically to inhibit MCF-7 breast cancer cell proliferation and cell cycle progression in vitro and in vivo. *Mol. Cancer Ther.* **6**, 2458-2467 (2007).
22. Balasis, M.E. *et al.* Combination of farnesyltransferase and Akt inhibitors is synergistic in breast cancer cells and causes significant tumor regression in ErbB2 transgenic mice. *Clin. Cancer Res.* **17**, 2852-2862 (2011).
