# Supplementary material
Source: PubMed Central journal article supplement (PMC4037130)
Supplement: NIHMS561517-supplement-S4.pdf [file NIHMS561517-supplement-S4.pdf]

Supplementary Information S4 (Table) | Clinical trials with farnesyltransferase inhibitors

| Drug(s)                      | Disease                 | Phase | Patients | Median Age | Clinical response |       |     |                         | FT or Prenylation                        | Response rate                       | Other Comments or Quotes                                               | Refs. |
|------------------------------|-------------------------|-------|----------|------------|-------------------|-------|-----|-------------------------|------------------------------------------|-------------------------------------|------------------------------------------------------------------------|-------|
|                              |                         |       |          |            | CR                | PR HI | SD  | PD MD                   |                                          |                                     |                                                                        |       |
| Tipifarnib                   | Acute leukaemia         | I     | 34       | 63         | 2                 | 8     |     |                         | FT↓ and HDJ2↓                            | 29.4 %                              | No <i>NRAS</i> mutations in patient tumours                            | 1     |
|                              | Advanced bladder cancer | II    | 34       | 64         |                   | 2     | 13  |                         | n/d                                      | 5.9                                 | Response rate does not warrant further investigation                   | 2     |
|                              | Advanced breast cancer  | II    | 76       | 54         |                   | 9     | 9   |                         | n/d                                      | 11.8 %                              | All responders had wt <i>RAS</i> genes                                 | 3     |
|                              | Advanced colon cancer   | II    | 55       | 69         |                   | 1     | 11  | 31                      | n/d                                      | 1.8 %                               | Tipifarnib is ineffective                                              | 4     |
|                              | Advanced NSCLC          | II    | 44       | 71         |                   |       | 7   |                         | HDJ2↓ and PrelaminA↓. FT↓ in 83% of pts. | 0 %                                 | No objective response. Future studies should be done with combinations | 5     |
|                              | Advanced solid tumours  | I     | 25       | 58         | 0                 | 0     | 8   | 17                      | Data not shown                           | 0 %                                 | No objective response                                                  | 6     |
|                              | Advanced solid tumours  | I     | 9        | 53         |                   |       | 1   | 8                       | n/d                                      | 0 %                                 | No objective response                                                  | 7     |
|                              | Advanced solid tumours  | I     | 28       | 56         |                   | 2     | 3   |                         | n/d                                      | 7.1 %                               | 5/15 pts have <i>KRAS</i> mutation                                     | 8     |
|                              | Advanced solid tumours  | I     | 21       |            |                   |       | 6   |                         | n/d                                      | 0 %                                 | No objective response. Phase II trial recommended                      | 9     |
|                              | AML                     | II    | 252      | 62         | 11                | 8     |     |                         | n/d                                      | 7.5 %                               | MS for pts with CR: 369 d                                              | 10    |
|                              | AML                     | II    |          |            | 22                | 3     | 50  | 58                      | HDJ2↓                                    | 17.2 %                              | Median duration of CR: 7.3 mos                                         | 11    |
|                              | AML                     | III   |          |            | 18                | 20    | 105 | 36                      | n/d                                      | 16.7 %                              | MS: 107 d. 8 % of pts have a CR with an MS of 666 d                    | 12    |
|                              |                         |       |          |            | 0                 | 3     | 130 | 46                      |                                          | 1.3 %                               |                                                                        |       |
|                              | Brain tumours           | II    |          |            |                   | 2     |     |                         | n/d                                      | 2.5 %                               | Very little activity                                                   | 13    |
|                              | CML, myelofibrosis, MM  | II    |          |            |                   | 7     |     |                         | n/d                                      | 17.5 %                              | Clinical activity in CML and myelofibrosis                             | 14    |
| Metastatic pancreatic cancer | II                      |       | 20       | 61         |                   |       | 1   | FT↓ by 50% HDJ2↓ by 33% | 0 %                                      | No objective response. MS: 19.7 wks | 15                                                                     |       |

should read "II"

|                                  |                        |       |     |    |    |    |     |                  |          |                                                                                                         |                                  |
|----------------------------------|------------------------|-------|-----|----|----|----|-----|------------------|----------|---------------------------------------------------------------------------------------------------------|----------------------------------|
| MM                               | II                     | 36    | 62  | 0  | 0  | 23 | 13  | FT↓ and HDJ2↓    | 0 %      | No objective response. No correlation between FT↓ and disease stabilisation                             | 16                               |
| MDS                              | I                      | 20    | 66  | 1  | 5  |    | 1   | FT↓ and HDJ2↓    | 30 %     | No correlation between FT↓ and response. No correlation between <i>Ras</i> mutation status and response | 17                               |
| MDS                              | II                     | 27    | 66  | 2  | 1  |    |     | n/d              | 11.1 %   | Modest anti-tumour activity                                                                             | 18                               |
| MDS                              | II                     | 82    | 67  |    | 26 | 37 |     | n/d              | 31.7 %   | Median duration of CR: 11.5 mos                                                                         | 19                               |
| MDS                              | I                      | 61    | 68  | 3  | 13 |    |     | FT↓ by 75 %      | 26.2 %   | Only 1 responder with a <i>KRAS</i> mutation. No correlation between FT↓ and dose                       | 20                               |
| Neurofibromatosis, neurofibromas | I                      | 40    | ≤15 |    |    |    |     | FT↓ by 43% HDJ2↓ | 0 %      | No objective response                                                                                   | 21                               |
| Pancreatic cancer                | II                     | 53    | 6   |    |    |    |     | n/d              | 0 %      | No objective response. MS: 2.6 mos.                                                                     | 22                               |
| Small-cell lung cancer           | II                     | 20    | 6   |    |    |    |     | n/d              | 0 %      | No objective response. MS: 6.8 mos, progression-free MS: 1.4 mos.                                       | 23                               |
| Advanced colon cancer            | III                    | 235   | 6   |    |    |    | 55  | n/d              | 0.4 %    | MS: 174 24%<br>MS: 185 13%                                                                              | The "3" should be in superscript |
|                                  |                        | 133 2 | 62  | 0  | 0  | 17 | 107 |                  | 0 %      |                                                                                                         |                                  |
| Lonafarnib                       | Advanced solid tumours | I     | 24  | 57 | 0  | 0  | 2   | n/d              | 0 %      | No objec                                                                                                |                                  |
|                                  | Advanced solid tumours | I     | 12  | 61 | 0  | 0  |     | PrelaminA↓       | 0 %      | No objec                                                                                                |                                  |
|                                  | Advanced solid tumours | I     | 22  | 54 | 1  | 1  |     | FT↓              | 12.5 % 3 | Sponsor study early negative interim efficacy. FT↓ not correlated to response                           | 27                               |
|                                  | Advanced solid tumours | II    | 15  | 57 | 0  | 0  | 7   | n/d              | 0 %      | No objective response                                                                                   | 28                               |
|                                  | CML                    | Pilot | 13  | 62 | 0  | 2  |     | n/d              | 15.5 %   |                                                                                                         | 29                               |

|            |                                                            |    |    |    |   |   |    |    |                        |        |                                                                        |    |
|------------|------------------------------------------------------------|----|----|----|---|---|----|----|------------------------|--------|------------------------------------------------------------------------|----|
|            | CNS tumours                                                | I  | 48 | 12 | 0 | 1 | 9  |    | n/d                    | 2.1 %  |                                                                        | 30 |
|            | Metastatic colon cancer                                    | II | 21 | 64 | 0 | 0 | 3  |    | n/d                    | 0 %    | No objective response                                                  | 31 |
|            | MDS or sAML                                                | II | 16 | 70 |   | 1 |    |    | n/d                    | 6.7 %  |                                                                        | 32 |
|            | NSCLC                                                      | II | 29 | 58 |   | 3 | 11 | 15 | n/d                    | 10.3 % | MS: 39 mos. Well-tolerated. Further clinical trials recommended.       | 33 |
|            | Refractory urothelial cancer (transitional cell carcinoma) | II | 10 | 65 | 0 | 0 | 2  | 8  | Small HDJ2↓            | 0 %    | No objective response                                                  | 34 |
|            | Solid tumours                                              | I  | 20 | 59 |   | 1 | 8  |    | PrelaminA↓             | 5.0 %  |                                                                        | 35 |
| BMS-214662 | Acute leukaemia                                            | I  | 30 | 53 | 4 | 1 |    |    | Short-lived FT↓        | 16.7 % |                                                                        | 36 |
|            | Advanced solid tumours                                     | I  | 44 | 54 | 0 | 0 | 1  |    | transient FT↓ by 89.5% | 0 %    | No objective response. 1 pt w/ pancreatic cancer survives for >3.5 yrs | 37 |
|            | Advanced solid tumours                                     | I  | 68 | 60 | 0 | 0 | 5  |    | Short-lived FT↓        | 0 %    | No objective response                                                  | 38 |
|            | Advanced solid tumours                                     | I  | 19 | 55 |   |   | 1  | 18 | n/d                    | 0 %    | No objective response                                                  | 39 |
|            | Solid tumours                                              | I  | 25 | 57 |   | 1 | 16 | 8  | Short-lived FT↓        | 4.0 %  | Response was minor                                                     | 40 |

This table is only about FTIs because so far, to our knowledge, only one GGTI, GGTI-2418, is in clinical trials. Studies that did not evaluate tumour response are not included. Median ages are rounded to the closest integer. In the “patients” column the number of evaluable patients are stated whenever possible. The response rate was calculated by dividing the sum of complete and partial responses by the number of evaluable patients.

Downward arrows indicate reduction of enzyme activity (in the case of FT) or reduction in farnesylation (in the case of HDJ2 or prelamin A).

<sup>1</sup> This patient cohort received best supportive care. <sup>2</sup> In this study all patients received best supportive care, with 235 receiving tipifarnib, and 133 receiving a placebo. <sup>3</sup> Number differs from the authors’ calculation who included SD, resulting in a response rate of 37.5 %.

AML, acute myeloid leukaemia; BSC, best supportive care; CML, chronic myeloid leukaemia; CNS, central nervous system, CR, complete response; FNTB, farnesyltransferase β-subunit; FT, farnesyltransferase activity; HI, haematological improvement; MD, metastatic disease; MDS, myelodysplastic syndrome; MM; multiple myeloma; MS, median survival; n/d, not determined; NSCLC, non-small cell lung cancer; OS, overall survival; PD, progressive disease; PR, partial response; Pt, pts, patient(s); sAML, secondary acute myeloid leukaemia; SD, stable disease; TTP, median time to progression.

1. Karp, J.E. *et al.* Clinical and biologic activity of the farnesyltransferase inhibitor R115777 in adults with refractory and relapsed acute leukemias: a phase 1 clinical-laboratory correlative trial. *Blood* **97**, 3361-3369 (2001).
2. Rosenberg, J.E. *et al.* A phase II trial of R115777, an oral farnesyl transferase inhibitor, in patients with advanced urothelial tract transitional cell carcinoma. *Cancer* **103**, 2035-2041 (2005).
3. Johnston, S.R. *et al.* Phase II study of the efficacy and tolerability of two dosing regimens of the farnesyl transferase inhibitor, R115777, in advanced breast cancer. *J. Clin. Oncol.* **21**, 2492-2499 (2003).
4. Whitehead, R.P. *et al.* Phase II trial of R115777 (NSC #70818) in patients with advanced colorectal cancer: a Southwest Oncology Group study. *Invest. New Drugs* **24**, 335-341 (2006).
5. Adjei, A.A. *et al.* Phase II study of the farnesyl transferase inhibitor R115777 in patients with advanced non-small-cell lung cancer. *J. Clin. Oncol.* **21**, 1760-1766 (2003).
6. Zujewski, J. *et al.* Phase I and pharmacokinetic study of farnesyl protein transferase inhibitor R115777 in advanced cancer. *J. Clin. Oncol.* **18**, 927-941 (2000).
7. Punt, C.J., van Maanen, L., Bol, C.J., Seifert, W.F. & Wagener, D.J. Phase I and pharmacokinetic study of the orally administered farnesyl transferase inhibitor R115777 in patients with advanced solid tumors. *Anticancer Drugs* **12**, 193-197 (2001).
8. Crul, M. *et al.* Phase I clinical and pharmacologic study of chronic oral administration of the farnesyl protein transferase inhibitor R115777 in advanced cancer. *J. Clin. Oncol.* **20**, 2726-2735 (2002).
9. Lara, P.N., Jr. *et al.* Intermittent dosing of the farnesyl transferase inhibitor tipifarnib (R115777) in advanced malignant solid tumors: a phase I California Cancer Consortium Trial. *Anticancer Drugs* **16**, 317-321 (2005).
10. Harousseau, J.L. *et al.* A phase 2 study of the oral farnesyltransferase inhibitor tipifarnib in patients with refractory or relapsed acute myeloid leukemia. *Blood* **109**, 5151-5156 (2007).
11. Lancet, J.E. *et al.* A phase 2 study of the farnesyltransferase inhibitor tipifarnib in poor-risk and elderly patients with previously untreated acute myelogenous leukemia. *Blood* **109**, 1387-1394 (2007).
12. Harousseau, J.L. *et al.* A randomized phase 3 study of tipifarnib compared with best supportive care, including hydroxyurea, in the treatment of newly diagnosed acute myeloid leukemia in patients 70 years or older. *Blood* **114**, 1166-1173 (2009).
13. Fouladi, M. *et al.* A phase II study of the farnesyl transferase inhibitor, tipifarnib, in children with recurrent or progressive high-grade glioma, medulloblastoma/primitive neuroectodermal tumor, or brainstem glioma: a Children's Oncology Group study. *Cancer* **110**, 2535-2541 (2007).
14. Cortes, J. *et al.* Efficacy of the farnesyl transferase inhibitor R115777 in chronic myeloid leukemia and other hematologic malignancies. *Blood* **101**, 1692-1697 (2003).
15. Cohen, S.J. *et al.* Phase II and pharmacodynamic study of the farnesyltransferase inhibitor R115777 as initial therapy in patients with metastatic pancreatic adenocarcinoma. *J. Clin. Oncol.* **21**, 1301-1306 (2003).
16. Alsina, M. *et al.* Farnesyltransferase inhibitor tipifarnib is well tolerated, induces stabilization of disease, and inhibits farnesylation and oncogenic/tumor survival pathways in patients with advanced multiple myeloma. *Blood* **103**, 3271-3277 (2004).
17. Kurzrock, R. *et al.* Farnesyltransferase inhibitor R115777 in myelodysplastic syndrome: clinical and biologic activities in the phase 1 setting. *Blood* **102**, 4527-4534 (2003).
18. Kurzrock, R. *et al.* Phase II study of R115777, a farnesyl transferase inhibitor, in myelodysplastic syndrome. *J. Clin. Oncol.* **22**, 1287-1292 (2004).
19. Fenaux, P. *et al.* A multicenter phase 2 study of the farnesyltransferase inhibitor tipifarnib in intermediate- to high-risk myelodysplastic syndrome. *Blood* **109**, 4158-4163 (2007).
20. Kurzrock, R. *et al.* Phase I study of alternate-week administration of tipifarnib in patients with myelodysplastic syndrome. *Clin. Cancer Res.* **14**, 509-514 (2008).
21. Widemann, B.C. *et al.* Phase I trial and pharmacokinetic study of the farnesyltransferase inhibitor tipifarnib in children with refractory solid tumors or

- neurofibromatosis type I and plexiform neurofibromas. *J. Clin. Oncol.* **24**, 507-516 (2006).
22. Macdonald, J.S. *et al.* A phase II study of farnesyl transferase inhibitor R115777 in pancreatic cancer: a Southwest oncology group (SWOG 9924) study. *Invest. New Drugs* **23**, 485-487 (2005).
23. Heymach, J.V. *et al.* Phase II study of the farnesyl transferase inhibitor R115777 in patients with sensitive relapse small-cell lung cancer. *Ann. Oncol.* **15**, 1187-1193 (2004).
24. Rao, S. *et al.* Phase III double-blind placebo-controlled study of farnesyl transferase inhibitor R115777 in patients with refractory advanced colorectal cancer. *J. Clin. Oncol.* **22**, 3950-3957 (2004).
25. Eskens, F.A. *et al.* Phase I and pharmacokinetic study of the oral farnesyl transferase inhibitor SCH 66336 given twice daily to patients with advanced solid tumors. *J. Clin. Oncol.* **19**, 1167-1175 (2001).
26. Awada, A. *et al.* Phase I and pharmacological study of the oral farnesyltransferase inhibitor SCH 66336 given once daily to patients with advanced solid tumours. *Eur. J. Cancer* **38**, 2272-2278 (2002).
27. Chow, L.Q. *et al.* A phase I safety, pharmacological, and biological study of the farnesyl protein transferase inhibitor, lonafarnib (SCH 663366), in combination with cisplatin and gemcitabine in patients with advanced solid tumors. *Cancer Chemother. Pharmacol.* **62**, 631-646 (2008).
28. Hanrahan, E.O. *et al.* A phase II study of Lonafarnib (SCH66336) in patients with chemorefractory, advanced squamous cell carcinoma of the head and neck. *Am. J. Clin. Oncol.* **32**, 274-279 (2009).
29. Borthakur, G. *et al.* Pilot study of lonafarnib, a farnesyl transferase inhibitor, in patients with chronic myeloid leukemia in the chronic or accelerated phase that is resistant or refractory to imatinib therapy. *Cancer* **106**, 346-352 (2006).
30. Kieran, M.W. *et al.* Phase I and pharmacokinetic study of the oral farnesyltransferase inhibitor lonafarnib administered twice daily to pediatric patients with advanced central nervous system tumors using a modified continuous reassessment method: a Pediatric Brain Tumor Consortium Study. *J. Clin. Oncol.* **25**, 3137-3143 (2007).
31. Sharma, S. *et al.* A phase II trial of farnesyl protein transferase inhibitor SCH 66336, given by twice-daily oral administration, in patients with metastatic colorectal cancer refractory to 5-fluorouracil and irinotecan. *Ann. Oncol.* **13**, 1067-1071 (2002).
32. Ravoet, C. *et al.* Farnesyl transferase inhibitor (lonafarnib) in patients with myelodysplastic syndrome or secondary acute myeloid leukaemia: a phase II study. *Ann. Hematol.* **87**, 881-885 (2008).
33. Kim, E.S. *et al.* Phase II study of the farnesyltransferase inhibitor lonafarnib with paclitaxel in patients with taxane-refractory/resistant nonsmall cell lung carcinoma. *Cancer* **104**, 561-569 (2005).
34. Winquist, E. *et al.* A multinomial Phase II study of lonafarnib (SCH 66336) in patients with refractory urothelial cancer. *Urol. Oncol.* **23**, 143-149 (2005).
35. Adjei, A.A. *et al.* A Phase I trial of the farnesyl transferase inhibitor SCH66336: evidence for biological and clinical activity. *Cancer Res.* **60**, 1871-1877 (2000).
36. Cortes, J. *et al.* Phase I study of BMS-214662, a farnesyl transferase inhibitor in patients with acute leukemias and high-risk myelodysplastic syndromes. *J. Clin. Oncol.* **23**, 2805-2812 (2005).
37. Ryan, D.P. *et al.* Phase I clinical trial of the farnesyltransferase inhibitor BMS-214662 given as a 1-hour intravenous infusion in patients with advanced solid tumors. *Clin. Cancer Res.* **10**, 2222-2230 (2004).
38. Tabernero, J. *et al.* Phase I pharmacokinetic and pharmacodynamic study of weekly 1-hour and 24-hour infusion BMS-214662, a farnesyltransferase inhibitor, in patients with advanced solid tumors. *J. Clin. Oncol.* **23**, 2521-2533 (2005).
39. Eder, J.P., Jr. *et al.* Phase I clinical trial of the farnesyltransferase inhibitor BMS-214662 administered as a weekly 24 h continuous intravenous infusion in patients with advanced solid tumors. *Cancer Chemother. Pharmacol.* **58**, 107-116 (2006).
40. Papadimitrakopoulou, V. *et al.* Phase I study of the farnesyltransferase inhibitor BMS-214662 given weekly in patients with solid tumors. *Clin. Cancer Res.* **11**, 4151-4159 (2005).
