# Supplementary material
Source: PubMed Central journal article supplement (PMC4037130)
Supplement: NIHMS561517-supplement-S5.pdf [file NIHMS561517-supplement-S5.pdf]

Supplementary Information S5 (Table) | Clinical trials with combinations including FTIs

| Drug(s)                                    | Disease                      | Phase | Patients         | Median Age | Clinical response |                 |    |       | FT or Prenylation         | Response rate | Other Comments or Quotes                          | Refs. |
|--------------------------------------------|------------------------------|-------|------------------|------------|-------------------|-----------------|----|-------|---------------------------|---------------|---------------------------------------------------|-------|
|                                            |                              |       |                  |            | CR                | PR HI           | SD | PD MD |                           |               |                                                   |       |
| Tipifarnib + Capecitabine                  | Advanced solid tumours       | I     | 41               | 57         |                   | 5               | 11 |       | FT↓ and HDJ2↓             | 12.2 %        | No correlation between FT↓ and response           | 1     |
| Tipifarnib + Doxorubicin, Cyclophosphamide | Advanced breast cancer       | I, II | 32               | 51         | 7                 |                 |    |       | FT↓ by 55-100%            | 21.9 %        |                                                   | 2     |
|                                            | Stage IIB-IIIC breast cancer | II    | 44               | 51         | 11                |                 |    |       | Median FT↓ by 91%         | 25 %          |                                                   | 3     |
| Tipifarnib + Etoposide                     | AML                          | I     | 84               | 77         | 20                |                 |    |       | p-S6↓                     | 23.4 %        |                                                   | 4     |
| Tipifarnib + Gemcitabine                   | Advanced solid tumours       | I     | 19               | 59         |                   | 2               |    |       | HDJ2↓                     | 10.5 %        |                                                   | 5     |
| Tipifarnib + Gemcitabine                   | Advanced pancreatic cancer   | III   | 341              | 61         | 6                 |                 | 53 | 28    | n/d                       | 1.8 %         | MS: 193 d, 6mo survival: 53%, 1yr survival: 27 %  | 6     |
|                                            |                              |       | 347 <sup>1</sup> | 62         | 8                 |                 | 52 | 30    |                           | 2.3 %         | MS: 182 d, 6 mo survival: 49%, 1yr survival: 24 % |       |
| Tipifarnib + Gemcitabine, Cisplatin        | Advanced solid tumours       | I     | 27               | 58         | 1                 | 8               |    |       | PrelaminA↓                | 33.3 %        |                                                   | 7     |
|                                            | Advanced solid tumours       | I     | 31               | 58         |                   | 8               | 12 |       | n/d                       | 25.8 %        | Phase II trial recommended                        | 8     |
| Tipifarnib + Idarubicin + Cytarabine       | AML, MDS                     | I-II  | 95               | 50         | 61 <sup>3</sup>   | 9 <sup>3</sup>  |    |       | n/d                       | 74 %          | MS: 17 mos                                        | 9     |
|                                            |                              |       | 108 <sup>2</sup> | 52         | 65 <sup>3</sup>   | 11 <sup>3</sup> |    |       |                           | 70 %          | MS: 13 mos                                        |       |
| Tipifarnib + Imatinib                      | CML                          | I     | 25               | 62         |                   | 17              |    |       | n/d                       | 68 %          | 11 pts withdrew (lack of response)                | 10    |
| Tipifarnib + Irinotecan                    | Solid tumours                | I     | 35               | 52         |                   | 3               | 14 | 13    | n/d                       | 8.6 %         |                                                   | 11    |
| Tipifarnib + letrozole                     | Advanced breast cancer       | II    | 74               | 60         | 3                 | 19              | 29 | 23    | n/d                       | 29.7 %        | No improvement by Tipifarnib                      | 12    |
|                                            |                              |       | 39 <sup>1</sup>  | 61         | 1                 | 14              | 15 | 9     |                           | 38.5 %        |                                                   |       |
| Tipifarnib + Sorafenib                     | Advanced solid tumours       | I     | 43               | 56         |                   | 3               | 15 | 20    | 25% of pts with > 50% FT↓ | 7.0 %         |                                                   | 13    |
| Tipifarnib + Tamoxifen                     | Metastatic breast cancer     | I     | 12               | 50         |                   | 2               | 1  |       | FT↓ 42-54%                | 16.7 %        |                                                   | 14    |

|                                       |                            |     |                  |    |   |                |    |   |                           |         |                                                       |    |
|---------------------------------------|----------------------------|-----|------------------|----|---|----------------|----|---|---------------------------|---------|-------------------------------------------------------|----|
| Lonafarnib + Carboplatin + Paclitaxel | Advanced NSCLC             | III | 308              | ?  |   |                |    |   | n/a                       | n/a     | OS: 144 d, TTP: 137 d                                 | 15 |
|                                       |                            |     | 308 <sup>1</sup> | ?  |   |                |    |   |                           | n/a     | n/a                                                   |    |
| Lonafarnib + Docetaxel                | Advanced solid tumours     | I   | 29               |    | 1 |                | 6  |   |                           | 3.4 %   | Response (CR+SD) correlates with low FNTB mRNA levels | 16 |
| Lonafarnib + Gemcitabine              | Advanced bladder cancer    | II  | 31               | 64 | 1 | 9              |    |   | n/d                       | 32.3 %  | MS: 11.5 mos, TTP: 7 mos                              | 17 |
| Lonafarnib + Imatinib                 | CML                        | I   | 23               | 55 | 6 | 2              |    |   | n/d                       | 34.7 %  |                                                       | 18 |
| Lonafarnib + Paclitaxel               | Solid tumours              | I   | 21               | 60 |   | 6              |    |   | n/d                       | 28.6 %  | 6 pts previously treated                              | 19 |
| BMS-214662 + Cisplatin                | Advanced solid tumours     | I   | 23               | 57 |   |                | 15 |   | Short-lived FT↓           | 0 %     | No objective response                                 | 20 |
| BMS-214662 + Paclitaxel               | Advanced solid tumours     | I   | 26               | 60 |   | 2 <sup>?</sup> |    |   | Short-lived FT↓           | ≤ 7.7 % |                                                       | 21 |
| BMS-214662 + Paclitaxel, Carboplatin  | Advanced solid tumours     | I   | 30               | 58 |   | 3              | 8  |   | Short-lived FT↓ and HDJ2↓ | 10.0 %  | No correlation between dose and HDJ2↓                 | 22 |
| L-778,123 + radiotherapy              | Advanced solid tumours     | I   | 7                | 59 | 5 | 1              |    | 6 | n/d                       | 85.7 %  | No RAS mutations                                      | 23 |
|                                       | Advanced pancreatic cancer | I   | 10               | 59 |   | 1              | 5  | 4 | HDJ2↓                     | 10.0 %  | <del>3/4</del> pts have KRAS mutation                 | 24 |

This table is only about FTIs because so far, to our knowledge, only one GGTI, GGTI-2418, is in clinical trials. Studies where tumour response was not evaluated are not included. Median ages are rounded to the closest integer. In the “patients” column the number of evaluable patients are stated whenever possible. The response rate was calculated by dividing the sum of complete and partial responses by the number of evaluable patients.

Downward arrows indicate reduction of enzyme activity (in the case of FT) or reduction in farnesylation (in the case of HDJ2 or prelamin A).

<sup>1</sup> This patient cohort received a placebo instead of the FTI. <sup>2</sup> This patient cohort received idarubicin + cytarabine (referred to by the authors as ‘historical control’). <sup>3</sup> Since the reference only provides % response rates, the patient numbers were calculated

should read 3 out of 4 pts examined have KRAS mutations

AML, acute myeloid leukaemia; CML, chronic myeloid leukaemia; CR, complete response; FNTB, farnesyltransferase  $\beta$ -subunit; FT, farnesyltransferase activity; HI, haematological improvement; MD, metastatic disease; MDS, myelodysplastic syndrome; MS, median survival; n/d, not determined; NSCLC, non-small cell lung cancer; OS, overall survival; p-, phosphorylated form of a protein; PD, progressive disease; PR, partial response; Pt, pts, patient(s); SD, stable disease; TTP, median time to progression.

1. Gore, L. *et al.* A phase I safety, pharmacological and biological study of the farnesyl protein transferase inhibitor, tipifarnib and capecitabine in advanced solid tumors. *Ann. Oncol.* **17**, 1709-1717 (2006).
2. Sparano, J.A. *et al.* Targeted inhibition of farnesyltransferase in locally advanced breast cancer: a phase I and II trial of tipifarnib plus dose-dense doxorubicin and cyclophosphamide. *J. Clin. Oncol.* **24**, 3013-3018 (2006).
3. Sparano, J.A. *et al.* Phase II trial of tipifarnib plus neoadjuvant doxorubicin-cyclophosphamide in patients with clinical stage IIB-IIIC breast cancer. *Clin. Cancer Res.* **15**, 2942-2948 (2009).
4. Karp, J.E. *et al.* Active oral regimen for elderly adults with newly diagnosed acute myelogenous leukemia: a preclinical and phase 1 trial of the farnesyltransferase inhibitor tipifarnib (R115777, Zarnestra) combined with etoposide. *Blood* **113**, 4841-4852 (2009).
5. Patnaik, A. *et al.* A phase I, pharmacokinetic, and biological study of the farnesyltransferase inhibitor tipifarnib in combination with gemcitabine in patients with advanced malignancies. *Clin. Cancer Res.* **9**, 4761-4771 (2003).
6. Van Cutsem, E. *et al.* Phase III trial of gemcitabine plus tipifarnib compared with gemcitabine plus placebo in advanced pancreatic cancer. *J. Clin. Oncol.* **22**, 1430-1438 (2004).
7. Adjei, A.A. *et al.* A Phase I trial of the farnesyl protein transferase inhibitor R115777 in combination with gemcitabine and cisplatin in patients with advanced cancer. *Clin. Cancer Res.* **9**, 2520-2526 (2003).
8. Siegel-Lakshai, W.S. *et al.* Phase I and pharmacological study of the farnesyltransferase inhibitor tipifarnib (Zarnestra, R115777) in combination with gemcitabine and cisplatin in patients with advanced solid tumours. *Br. J. Cancer* **93**, 1222-1229 (2005).
9. Jabbour, E. *et al.* A phase 1-2 study of a farnesyltransferase inhibitor, tipifarnib, combined with idarubicin and cytarabine for patients with newly diagnosed acute myeloid leukemia and high-risk myelodysplastic syndrome. *Cancer* (2010).
10. Cortes, J. *et al.* Phase 1 study of tipifarnib in combination with imatinib for patients with chronic myelogenous leukemia in chronic phase after imatinib failure. *Cancer* **110**, 2000-2006 (2007).
11. Sparreboom, A. *et al.* Phase I and pharmacokinetic study of irinotecan in combination with R115777, a farnesyl

- protein transferase inhibitor. *Br. J. Cancer* **90**, 1508-1515 (2004).
12. Johnston, S.R. *et al.* A phase II, randomized, blinded study of the farnesyltransferase inhibitor tipifarnib combined with letrozole in the treatment of advanced breast cancer after antiestrogen therapy. *Breast Cancer Res. Treat.* **110**, 327-335 (2008).
  13. Hong, D.S. *et al.* Phase I trial of a combination of the multikinase inhibitor sorafenib and the farnesyltransferase inhibitor tipifarnib in advanced malignancies. *Clin. Cancer Res.* **15**, 7061-7068 (2009).
  14. Lebowitz, P.F. *et al.* A phase I trial and pharmacokinetic study of tipifarnib, a farnesyltransferase inhibitor, and tamoxifen in metastatic breast cancer. *Clin. Cancer Res.* **11**, 1247-1252 (2005).
  15. Blumenschein, G. *et al.* A randomized phase III trial comparing lonafarnib/carboplatin/paclitaxel versus carboplatin/paclitaxel (CP) in chemotherapy-naïve patients with advanced or metastatic non-small cell lung cancer. *Lung Cancer* **49** (Suppl. 2), S30 (2005).
  16. Kauh, J. *et al.* Farnesyl transferase expression determines clinical response to the docetaxel-lonafarnib combination in patients with advanced malignancies. *Cancer* (2011).
  17. Theodore, C. *et al.* Multicentre EORTC study 16997: feasibility and phase II trial of farnesyl transferase inhibitor & gemcitabine combination in salvage treatment of advanced urothelial tract cancers. *Eur. J. Cancer* **41**, 1150-1157 (2005).
  18. Cortes, J. *et al.* Phase 1 study of lonafarnib (SCH 66336) and imatinib mesylate in patients with chronic myeloid leukemia who have failed prior single-agent therapy with imatinib. *Cancer* **110**, 1295-1302 (2007).
  19. Khuri, F.R. *et al.* Phase I study of the farnesyltransferase inhibitor lonafarnib with paclitaxel in solid tumors. *Clin. Cancer Res.* **10**, 2968-2976 (2004).
  20. Mackay, H.J. *et al.* A phase I pharmacokinetic and pharmacodynamic study of the farnesyl transferase inhibitor BMS-214662 in combination with cisplatin in patients with advanced solid tumors. *Clin. Cancer Res.* **10**, 2636-2644 (2004).
  21. Bailey, H.H. *et al.* Phase I trial of weekly paclitaxel and BMS-214662 in patients with advanced solid tumors. *Clin. Cancer Res.* **13**, 3623-3629 (2007).
  22. Dy, G.K. *et al.* A phase I trial of the novel farnesyl protein transferase inhibitor, BMS-214662, in combination with paclitaxel and carboplatin in patients with advanced cancer. *Clin. Cancer Res.* **11**, 1877-1883 (2005).
  23. Hahn, S.M. *et al.* A Phase I trial of the farnesyltransferase inhibitor L-778,123 and radiotherapy for locally advanced lung and head and neck cancer. *Clin. Cancer Res.* **8**, 1065-1072 (2002).
  24. Martin, N.E. *et al.* A phase I trial of the dual farnesyltransferase and geranylgeranyltransferase inhibitor L-778,123 and radiotherapy for locally advanced pancreatic cancer. *Clin. Cancer Res.* **10**, 5447-5454 (2004).
